# Supplementary material for: Structure of the siphophage neck–Tail complex suggests that conserved tail tip proteins facilitate receptor binding and tail assembly
Source: PLOS journal article supplement (doi:10.1371/journal.pbio.3002441), 2023-12-14
Supplement: S18 (10.1371/journal.pbio.3002441.s018) [file journal.pbio.3002441.s018]

**S2 Table. Detected proteins of the siphophage lambda by mass spectrometry.**

| <b>Proteins</b> | <b>Description</b>      | <b>No. unique peptides</b> | <b>Peptides</b> | <b>Coverage/%</b> | <b>Score</b> |
|-----------------|-------------------------|----------------------------|-----------------|-------------------|--------------|
| gpE             | Coat protein            | 27                         | 36              | 65.69             | 473.44       |
| gpH             | Tape measure protein    | 53                         | 53              | 50.06             | 156.00       |
| gpV             | Tail tube protein       | 17                         | 17              | 67.48             | 120.37       |
| gpB             | Portal protein          | 14                         | 24              | 54.41             | 108.62       |
| gpD             | Cementing protein       | 8                          | 8               | 68.18             | 106.62       |
| gpJ             | Central fiber protein   | 48                         | 48              | 43.82             | 93.73        |
| gpZ             | Tail completion protein | 10                         | 10              | 48.44             | 21.47        |
| gpC             | Protease protein        | 8                          | 8               | 28.25             | 21.18        |
| gpM             | Distal tail protein     | 7                          | 7               | 66.06             | 19.01        |
| gpW             | Adaptor protein         | 6                          | 6               | 69.12             | 18.94        |
| gpFII           | Stopper protein         | 6                          | 6               | 74.36             | 11.92        |
| gpL             | Hub protein             | 8                          | 8               | 43.53             | 7.58         |
| gpI             | Insertion protein       | 1                          | 1               | 9.87              | 3.81         |
| gpU             | Tail terminator protein | 2                          | 2               | 15.27             | 3.76         |
